# Supplementary material for: Migratory Dermal Dendritic Cells Act as Rapid Sensors of Protozoan Parasites
Source: PubMed Central journal article supplement (PMC2583051; doi:10.1371/journal.ppat.1000222), 2008-11-28

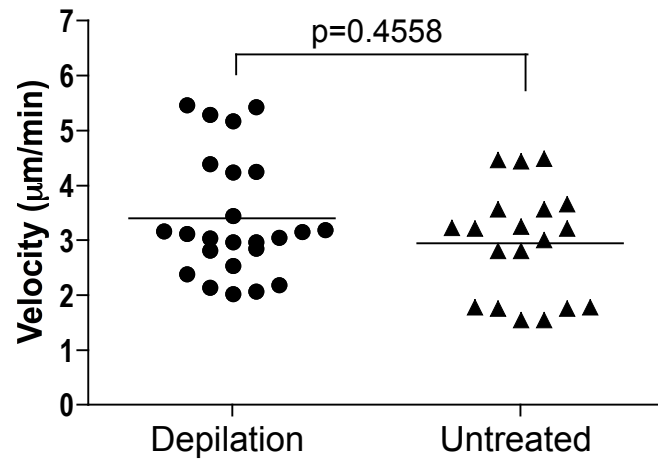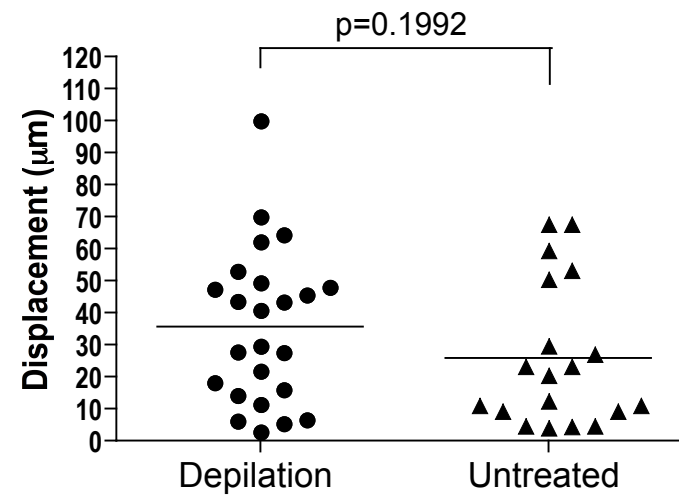

Supplement: ppat.1000222.s005.pdf [file ppat.1000222.s005.pdf]
